# Supplementary material for: The divergence history of European blue mussel species reconstructed from Approximate Bayesian Computation: the effects of sequencing techniques and sampling strategies
Source: PubMed Central journal article supplement (PMC6071616; doi:10.7717/peerj.5198), 2018-07-30
Supplement: peerj-06-5198-s001.pdf [file peerj-06-5198-s001.pdf]

Table S1. Posterior probabilities of the 11 models in the mussel datasets

| technique     | n1 | n2 | statistics | PP    |           |           |           |            |            |         |         |         |          |          |
|---------------|----|----|------------|-------|-----------|-----------|-----------|------------|------------|---------|---------|---------|----------|----------|
|               |    |    |            | SI    | IM.hetero | AM.hetero | SC.hetero | PAM.hetero | PSC.hetero | IM.homo | AM.homo | SC.homo | PAM.homo | PSC.homo |
| exome capture | 2  | 2  | s4         | 0.028 | 0.002     | 0.159     | 0.002     | 0.249      | 0.001      | 0.001   | 0.193   | 0.002   | 0.360    | 0.003    |
| exome capture | 2  | 2  | s7         | 0.060 | 0.006     | 0.139     | 0.004     | 0.246      | 0.003      | 0.001   | 0.230   | 0.001   | 0.309    | 0.001    |
| exome capture | 2  | 2  | s23        | 0.009 | 0.251     | 0.007     | 0.319     | 0.007      | 0.385      | 0.002   | 0.006   | 0.004   | 0.007    | 0.003    |
| exome capture | 2  | 2  | mscal      | 0.369 | 0.002     | 0.235     | 0.094     | 0.050      | 0.031      | 0.000   | 0.147   | 0.033   | 0.023    | 0.016    |
| exome capture | 4  | 4  | s4         | 0.023 | 0.019     | 0.126     | 0.014     | 0.255      | 0.013      | 0.004   | 0.200   | 0.003   | 0.340    | 0.003    |
| exome capture | 4  | 4  | s7         | 0.015 | 0.050     | 0.207     | 0.030     | 0.213      | 0.050      | 0.003   | 0.168   | 0.006   | 0.250    | 0.009    |
| exome capture | 4  | 4  | s23        | 0.000 | 0.332     | 0.000     | 0.228     | 0.001      | 0.363      | 0.004   | 0.000   | 0.049   | 0.001    | 0.022    |
| exome capture | 4  | 4  | mscal      | 0.006 | 0.078     | 0.020     | 0.396     | 0.051      | 0.342      | 0.009   | 0.006   | 0.022   | 0.017    | 0.054    |
| exome capture | 8  | 8  | s4         | 0.053 | 0.005     | 0.151     | 0.004     | 0.293      | 0.004      | 0.001   | 0.155   | 0.001   | 0.334    | 0.001    |
| exome capture | 8  | 8  | s7         | 0.074 | 0.007     | 0.157     | 0.007     | 0.254      | 0.011      | 0.001   | 0.151   | 0.001   | 0.337    | 0.002    |
| exome capture | 8  | 8  | s23        | 0.000 | 0.132     | 0.000     | 0.243     | 0.000      | 0.609      | 0.005   | 0.000   | 0.007   | 0.000    | 0.004    |
| exome capture | 8  | 8  | mscal      | 0.344 | 0.001     | 0.002     | 0.119     | 0.001      | 0.232      | 0.000   | 0.003   | 0.074   | 0.000    | 0.223    |
| rna-seq       | 2  | 2  | s4         | 0.004 | 0.056     | 0.142     | 0.099     | 0.227      | 0.090      | 0.016   | 0.137   | 0.017   | 0.200    | 0.011    |
| rna-seq       | 2  | 2  | s7         | 0.072 | 0.098     | 0.200     | 0.092     | 0.323      | 0.036      | 0.000   | 0.037   | 0.000   | 0.142    | 0.001    |
| rna-seq       | 2  | 2  | s23        | 0.009 | 0.159     | 0.005     | 0.388     | 0.003      | 0.414      | 0.000   | 0.003   | 0.010   | 0.007    | 0.001    |
| rna-seq       | 2  | 2  | mscal      | 0.005 | 0.113     | 0.060     | 0.312     | 0.071      | 0.344      | 0.000   | 0.001   | 0.071   | 0.004    | 0.018    |
| rna-seq       | 4  | 4  | s4         | 0.026 | 0.127     | 0.097     | 0.167     | 0.180      | 0.132      | 0.000   | 0.095   | 0.008   | 0.158    | 0.009    |
| rna-seq       | 4  | 4  | s7         | 0.034 | 0.017     | 0.155     | 0.019     | 0.339      | 0.034      | 0.001   | 0.158   | 0.003   | 0.237    | 0.004    |
| rna-seq       | 4  | 4  | s23        | 0.017 | 0.252     | 0.027     | 0.236     | 0.042      | 0.346      | 0.000   | 0.028   | 0.003   | 0.039    | 0.009    |
| rna-seq       | 4  | 4  | mscal      | 0.011 | 0.168     | 0.045     | 0.164     | 0.072      | 0.420      | 0.001   | 0.039   | 0.007   | 0.060    | 0.015    |

**technique:** rna sequencing ("rna-seq") vs. exome enrichment sequencing ("exome capture"); **n:** number of individuals analyzed in each species;

**statistics:**  $jsfs=4$  (4 classes),  $jsfs=7$  (7 classes),  $jsfs=23$  (23 classes), mscal (28 summary statistics); **PP:** posterior probability;

**11 models:** SI, IM hetero, IM homo, AM homo, AM hetero, PAM homo, PAM hetero, SC homo, SC hetero, PSC hetero, PSC homo.

Table S2. Posterior probabilities of the homo vs. hetero models in the mussel datasets

| technique     | n1 | n2 | statistics | IM         |       | AM         |       | PAM        |       | SC         |       | PSC        |       |
|---------------|----|----|------------|------------|-------|------------|-------|------------|-------|------------|-------|------------|-------|
|               |    |    |            | best_model | PP    | best_model | PP    | best_model | PP    | best_model | PP    | best_model | PP    |
| exome capture | 2  | 2  | jsfs=4     | hetero     | 0.656 | homo       | 0.542 | homo       | 0.557 | hetero     | 0.592 | hetero     | 0.527 |
| exome capture | 2  | 2  | jsfs=7     | hetero     | 0.860 | homo       | 0.578 | homo       | 0.695 | hetero     | 0.734 | hetero     | 0.771 |
| exome capture | 2  | 2  | jsfs=23    | hetero     | 0.991 | homo       | 0.530 | homo       | 0.632 | hetero     | 0.893 | hetero     | 0.990 |
| exome capture | 2  | 2  | mscal      | hetero     | 0.960 | hetero     | 0.827 | hetero     | 0.712 | hetero     | 0.938 | hetero     | 0.823 |
| exome capture | 4  | 4  | jsfs=4     | hetero     | 0.814 | homo       | 0.512 | homo       | 0.538 | hetero     | 0.898 | hetero     | 0.794 |
| exome capture | 4  | 4  | jsfs=7     | hetero     | 0.839 | homo       | 0.539 | homo       | 0.519 | hetero     | 0.958 | hetero     | 0.956 |
| exome capture | 4  | 4  | jsfs=23    | hetero     | 0.999 | hetero     | 0.722 | hetero     | 0.816 | hetero     | 0.916 | hetero     | 0.982 |
| exome capture | 4  | 4  | mscal      | hetero     | 0.971 | hetero     | 0.703 | homo       | 0.509 | hetero     | 0.955 | hetero     | 0.916 |
| exome capture | 8  | 8  | jsfs=4     | hetero     | 0.854 | hetero     | 0.580 | homo       | 0.509 | hetero     | 0.892 | hetero     | 0.769 |
| exome capture | 8  | 8  | jsfs=7     | hetero     | 0.901 | hetero     | 0.576 | homo       | 0.551 | hetero     | 0.969 | hetero     | 0.905 |
| exome capture | 8  | 8  | jsfs=23    | hetero     | 0.953 | hetero     | 0.618 | hetero     | 0.675 | hetero     | 0.926 | hetero     | 1.000 |
| exome capture | 8  | 8  | mscal      | hetero     | 0.794 | homo       | 0.643 | hetero     | 0.771 | hetero     | 0.933 | hetero     | 0.807 |
| rna-seq       | 2  | 2  | jsfs=4     | hetero     | 0.970 | homo       | 0.519 | hetero     | 0.556 | hetero     | 0.837 | hetero     | 0.832 |
| rna-seq       | 2  | 2  | jsfs=7     | hetero     | 0.916 | homo       | 0.523 | hetero     | 0.733 | hetero     | 0.973 | hetero     | 0.946 |
| rna-seq       | 2  | 2  | jsfs=23    | hetero     | 0.864 | homo       | 0.662 | hetero     | 0.671 | hetero     | 0.948 | hetero     | 0.818 |
| rna-seq       | 2  | 2  | mscal      | hetero     | 0.983 | hetero     | 0.595 | homo       | 0.687 | hetero     | 0.969 | hetero     | 0.987 |
| rna-seq       | 4  | 4  | jsfs=4     | hetero     | 0.975 | hetero     | 0.511 | hetero     | 0.575 | hetero     | 0.895 | hetero     | 0.893 |
| rna-seq       | 4  | 4  | jsfs=7     | hetero     | 0.996 | homo       | 0.526 | homo       | 0.520 | hetero     | 0.956 | hetero     | 0.929 |
| rna-seq       | 4  | 4  | jsfs=23    | hetero     | 1.000 | hetero     | 0.780 | hetero     | 0.824 | hetero     | 0.999 | hetero     | 0.997 |
| rna-seq       | 4  | 4  | mscal      | hetero     | 0.993 | homo       | 0.584 | hetero     | 0.583 | hetero     | 1.000 | hetero     | 0.986 |

**technique:** rna sequencing ("rna-seq") vs. exome enrichment sequencing ("exome capture"); **n:** number of individuals analyzed in each species; **statistics:** *jsfs=4* (4 classes), *jsfs=7* (7 classes), *jsfs=23* (23 classes), *mscal* (28 summary statistics); **PP:** posterior probability.

Table S3. Accuracy and ambiguity rate in the simulated datasets

| statistics | target_model | (A) homo vs. hetero |                | (B) 6 models (hetero) |                |
|------------|--------------|---------------------|----------------|-----------------------|----------------|
|            |              | accuracy_rate       | ambiguity_rate | accuracy_rate         | ambiguity_rate |
| jsfs=4     | IM hetero    | -                   | 1              | -                     | 0.99           |
| jsfs=7     | IM hetero    | 1                   | 0.98           | 0.70                  | 0.93           |
| jsfs=23    | IM hetero    | 1                   | 0.34           | 1.00                  | 0.25           |
| mscal      | IM hetero    | 1                   | 0.38           | 0.97                  | 0.4            |
| jsfs=4     | AM hetero    | -                   | 1              | 0.34                  | 0.47           |
| jsfs=7     | AM hetero    | -                   | 1              | 0.32                  | 0.48           |
| jsfs=23    | AM hetero    | 1                   | 0.57           | 0.42                  | 0.26           |
| mscal      | AM hetero    | 1                   | 0.7            | 0.44                  | 0.21           |
| jsfs=4     | PAM hetero   | -                   | 1              | 0.65                  | 0.45           |
| jsfs=7     | PAM hetero   | -                   | 1              | 0.70                  | 0.41           |
| jsfs=23    | PAM hetero   | 1                   | 0.69           | 0.79                  | 0.2            |
| mscal      | PAM hetero   | 1                   | 0.63           | 0.86                  | 0.14           |
| jsfs=4     | SC hetero    | -                   | 1              | 0.57                  | 0.88           |
| jsfs=7     | SC hetero    | 1                   | 0.97           | 0.48                  | 0.86           |
| jsfs=23    | SC hetero    | 1                   | 0.3            | 0.50                  | 0.31           |
| mscal      | SC hetero    | 1                   | 0.46           | 0.43                  | 0.61           |
| jsfs=4     | PSC hetero   | -                   | 1              | 0.75                  | 0.92           |
| jsfs=7     | PSC hetero   | 1                   | 0.99           | 0.89                  | 0.86           |
| jsfs=23    | PSC hetero   | 1                   | 0.37           | 1.00                  | 0.3            |
| mscal      | PSC hetero   | 1                   | 0.33           | 1.00                  | 0.52           |
| jsfs=4     | SI           | -                   | -              | 0.71                  | 0.27           |
| jsfs=7     | SI           | -                   | -              | 0.73                  | 0.21           |
| jsfs=23    | SI           | -                   | -              | 0.85                  | 0.15           |
| mscal      | SI           | -                   | -              | 0.92                  | 0.13           |

Cross validations have been performed on simulated datasets that mimic the feature of the “exome capture” data with  $n=2$  individuals. 100 pseudo-observed datasets were produced for each tested model, and a minimal posterior probability threshold,  $P_{\min}$ , was set-up to be  $1/3$  higher than the prior expectation, i.e.  $1/2+1/3=0.83$  in "homo vs. hetero", and  $1/6+1/3=0.43$  in "6 models (hetero)".

**statistics:**  $jsfs=4$  (4 classes),  $jsfs=7$  (7 classes),  $jsfs=23$  (23 classes), mscal (28 summary statistics);

**accuracy\_rate:** proportion of simulated datasets that correctly supported model M, given a minimal posterior probability ( $P_{\min}$ ). This is the proportion, among simulated datasets generated under all tested models and inferred by ABC to correspond to model M, of those actually generated under model M;

**ambiguity\_rate:** proportion of simulated datasets generated under model M whose posterior probability is below a certain threshold ( $P_{\min}$ ), such that model choice is ambiguous;

**6 models (hetero):** SI, IM hetero, AM hetero, PAM hetero, SC hetero, PSC hetero.
